# Supplementary material for: Gut Resistome of Preschool Children After Prolonged Mass Azithromycin Distribution: A Cluster-randomized Trial
Source: PubMed Central journal article supplement (PMC8492121; doi:10.1093/cid/ciab485), 2021-05-26
Supplement: ciab485_suppl_supplementary_materials.pdf [file ciab485_suppl_supplementary_materials.pdf]

Supplementary Materials for

**Gut resistome of preschool children after prolonged mass azithromycin distribution: a cluster-randomized trial.**

Ahmed M. Arzika<sup>1</sup>, Ramatou Maliki<sup>1</sup>, Amza Abdou<sup>2,3</sup>, Alio K. Mankara<sup>1</sup>, Abdoul N. Harouna<sup>1</sup>, Catherine Cook<sup>4</sup>, Armin Hinterwirth<sup>4</sup>, Lee Worden<sup>4</sup>, Lina Zhong<sup>4</sup>, Cindi Chen<sup>4</sup>, Kevin Ruder<sup>4</sup>, Zhaoxia Zhou<sup>4</sup>, Elodie Lebas<sup>4</sup>, Kieran S. O'Brien<sup>4</sup>, Catherine E. Oldenburg<sup>4,5,6</sup>, Victoria Le<sup>4</sup>, Benjamin Arnold<sup>4</sup>, Travis Porco<sup>4,5,6</sup>, Jeremy D. Keenan<sup>4,5,6</sup>, Thomas M. Lietman<sup>4,5,6,7</sup>, Thuy Doan<sup>4,5</sup>

**This PDF file includes:**

Figures S1-S3

Tables S1

Figure S1. Trial Profile

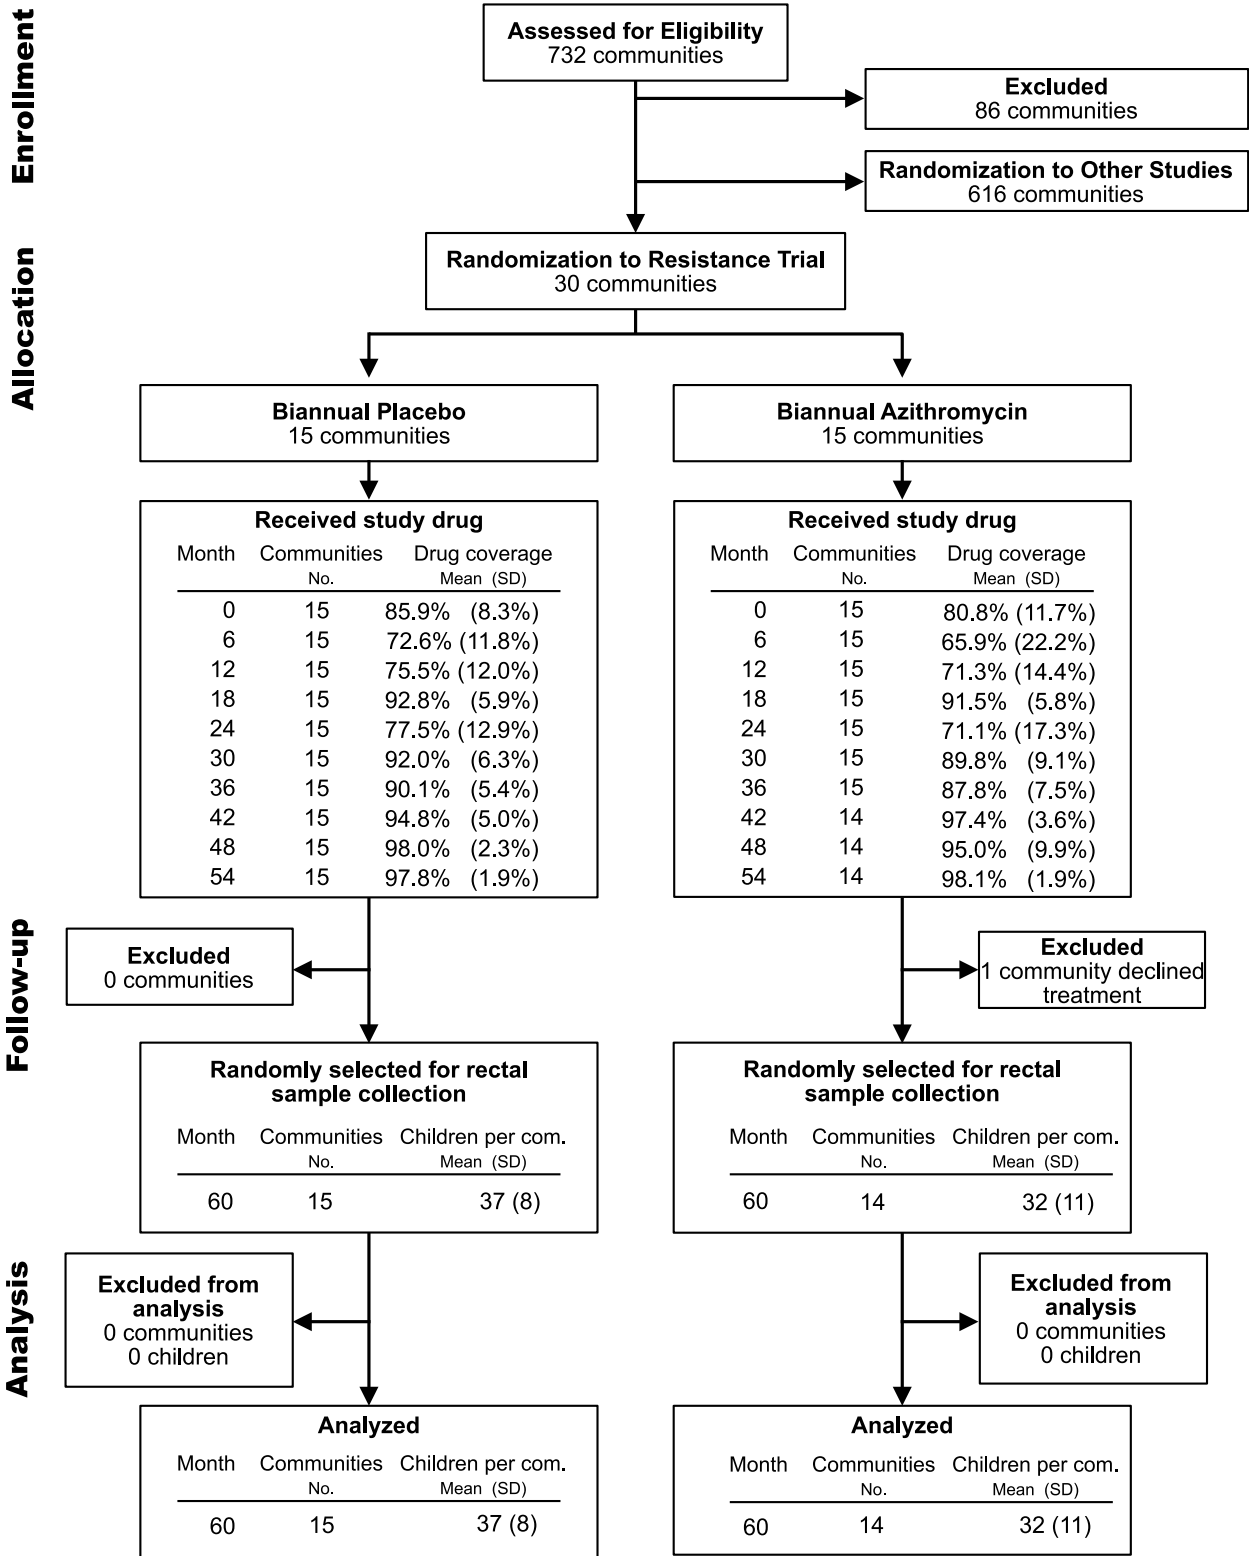

**Figure S2: Normalized macrolide resistance determinants for placebo- and azithromycin-treated villages at baseline, 24, 36, 48, and 60 months.** Bars indicate the mean and 95% confidence intervals. Each point represents a village.

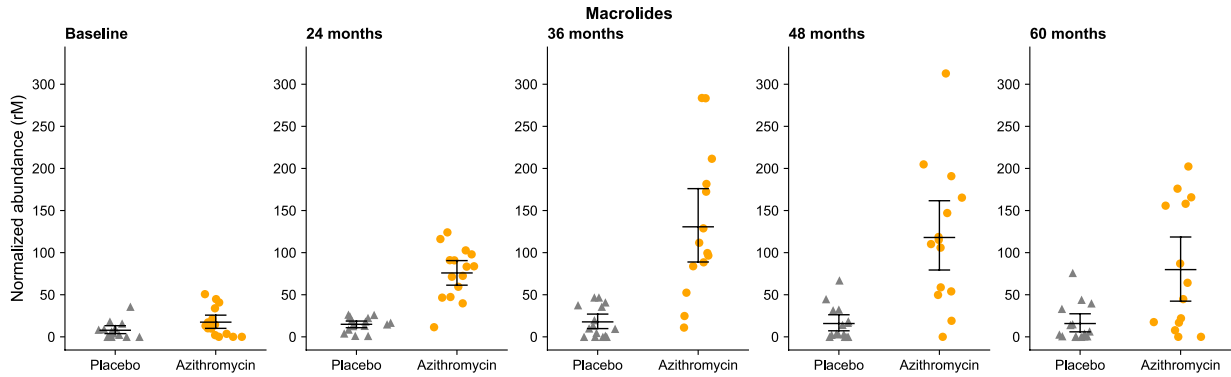

**Figure S3: Normalized non-macrolide resistance determinants for placebo- and azithromycin-treated villages at 60 months.** Bars indicate the mean and 95% confidence intervals. Each point represents a village.

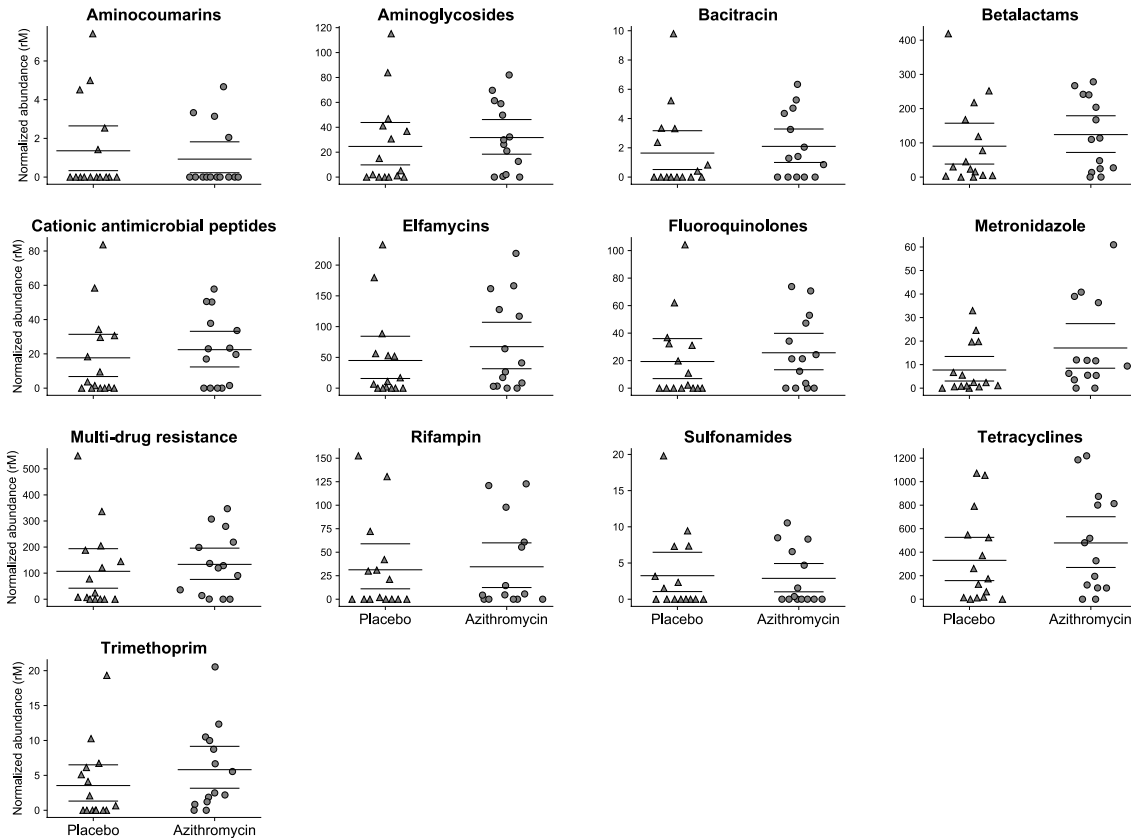

**Table S1: Demographics of Analyzed Participants**

|                           | <i>Rectal Swabs</i><br><i>60 months</i> |               |
|---------------------------|-----------------------------------------|---------------|
|                           | Placebo                                 | Azithromycin  |
| Number of children        | 557                                     | 447           |
| Number of communities     | 15                                      | 14            |
| Mean age, months (95% CI) | 32 (31 to 33)                           | 32 (30 to 34) |
| Female, % (95% CI)        | 48 (44 to 52)                           | 45 (39 to 50) |
